# Supplementary material for: Macrocyclic Se4N2[7,7]ferrocenophane and Se2N[10]ferrocenophane containing benzyl unit: synthesis, complexation, crystal structures, electrochemical and optical properties
Source: Royal Society of Chemistry journal article supplement (doi:10.1039/c5dt04763c), 2016-01-01
Supplement: c5dt04763c1.pdf [file c5dt04763c1.pdf]

## Supporting Information

### Macrocyclic $\text{Se}_4\text{N}_2[7,7]$ Ferrocenophane and $\text{Se}_2\text{N}[10]$ ferrocenophane Containing Benzyl Unit: Synthesis, Complexation, Crystal Structures, Electrochemical and Optical Properties

Jian Qu,<sup>a,b</sup> Yinglin Song,<sup>c</sup> Wei Ji,<sup>a,d</sup> Su Jing,<sup>\*a</sup> Dun-Ru Zhu,<sup>\*d</sup> Wei Huang<sup>\*b</sup>,  
Mengxi Zheng<sup>e</sup>, Yanle Li<sup>e</sup>, Jing Ma<sup>e</sup>

<sup>a</sup>School of Chemistry and Molecular Engineering, Nanjing Tech University, Nanjing 211800, China.

<sup>b</sup>Institute of Advanced Materials, Nanjing Tech University, Nanjing 210009, China.

<sup>c</sup>College of Physics, Optoelectronics and Energy, Soochow University, Suzhou 215006, China

<sup>d</sup>School of Chemical Engineering, Nanjing Tech University, Nanjing 210009, China.

<sup>e</sup>Institute of Theoretical and Computational Chemistry, School of Chemistry and Chemical Engineering, Nanjing University, Nanjing 210093, China

## Table of contents

**Table S1** Selected bond lengths (Å) and bond angles (°) for **L1-L2**

**Table S2** Selected bond lengths (Å) and bond angles (°) for **1-5**

**Figure S1** The C-H... $\pi$  interactions involving intermolecular C2-H2A...Cg (C1-C5) of **L1**.

**Figure S2** The C-H... $\pi$  interactions involving intermolecular C12-H12A...Cg of **L2**.

**Figure S3** Changes in the absorption spectra of receptor **L1** ( $2 \times 10^{-5}$  M) with increasing concentration of  $\text{Hg}^{2+}$  (0 to 4.0 equiv.) in a  $\text{CH}_3\text{CN}$  solution.

**Figure S4** Changes in the absorption spectra of receptor **L2** ( $2 \times 10^{-5}$  M) with increasing concentration of  $\text{Cu}^{2+}$  (0 to 3.0 equiv.) in a  $\text{CH}_3\text{CN}$  solution (inset:  $\text{Cu}^{2+}$  titration profile at 295 nm).

**Figure S5** (a) Absorbance of **L1** at different concentrations of  $\text{Cu}^{2+}$  added, normalized between the minimum absorbance and the maximum absorbance intensity. The detection limit was determined to be  $1.03 \times 10^{-5}$  M. (b) Absorbance of **L2** at different concentrations of  $\text{Cu}^{2+}$  added, normalized between the minimum absorbance and the maximum absorbance intensity. The detection limit was determined to be  $8.64 \times 10^{-6}$  M.

**Figure S6** The association constant for **L2**.

**Figure S7** The open aperture and closed aperture Z-scan results at 532 nm for **L1** in  $\text{CH}_3\text{CN}$ .

**Figure S8** Cyclic voltammogram of **L1** (black line) in acetonitrile upon addition of  $\text{Cu}^{2+}$  (red line) and  $\text{Hg}^{2+}$  (blue line).

**Figure S9** Cyclic voltammogram of **L2** (black line) in acetonitrile upon addition of  $\text{Cu}^{2+}$  (red line) and  $\text{Hg}^{2+}$  (blue line).

**Figure S10** UV-vis spectra of **L1** and 1,5,9,13-tetraselena[16]-naphtho[1,8-*c,d*]-ferrocenophane.

**Figure S11** The frontier orbitals of **3** and **L1**

**Table S1** Selected bond lengths (Å) and bond angles (°) for **L1-L2**<sup>a</sup>

| <b>L1</b>               |            |                      |          | <b>L2</b>  |           |            |            |
|-------------------------|------------|----------------------|----------|------------|-----------|------------|------------|
| Se1-C1                  | 1.911(2)   | Se1-C11 <sup>i</sup> | 1.954(3) | Se1-C1     | 1.901(4)  | N1-C12     | 1.471(5)   |
| Se2-C6                  | 1.902(3)   | Se2-C13              | 1.960(2) | Se1-C11    | 1.964(4)  | N1-C13     | 1.474(5)   |
| N1-C12                  | 1.463(3)   | N1-C14               | 1.472(3) | Se2-C6     | 1.906(4)  | N1-C15     | 1.461(5)   |
| N1-C15                  | 1.461(3)   |                      |          | Se2-C14    | 1.944(4)  |            |            |
| C1-Se1-C11 <sup>i</sup> | 98.52(10)  | C12-N1-C14           | 112.4(2) | C1-Se1-C11 | 99.43(16) | C6-Se2-C14 | 102.93(16) |
| C6-Se2-C13              | 99.85(11)  | C12-N1-C15           | 111.2(2) | C12-N1-C15 | 110.6(3)  | C13-N1-C15 | 110.5(3)   |
| C14-N1-C15              | 112.50(19) |                      |          | C12-N1-C13 | 111.4(3)  |            |            |

<sup>a</sup> Symmetry code i: -x, y, 0.5-z.

**Table S2** Selected bond lengths (Å) and bond angles (°) for **1-5<sup>a</sup>**

| <b>1</b>    |            | <b>2</b>    |            | <b>3</b>    |            | <b>4</b>    |            | <b>5</b>    |            |
|-------------|------------|-------------|------------|-------------|------------|-------------|------------|-------------|------------|
| Br1-Cu1     | 2.3594(15) | I1-Cu1      | 2.5146(8)  | N2-Cu1      | 1.953(5)   | O5-Cu1      | 2.077(3)   | Cl1-Pd1     | 2.2741(16) |
| Se1-Cu1     | 2.4054(14) | Se1-Cu1     | 2.4815(9)  | Se1-Cu1     | 2.4025(19) | Se1-Cu1     | 2.3623(6)  | Se2-Pd1     | 2.4297(9)  |
| Se1-C1      | 1.886(8)   | Se1-C1      | 1.906(5)   | Se1-C1      | 1.902(5)   | Se1-C1      | 1.898(3)   | Se1-C1      | 1.895(6)   |
| Se1-C11     | 1.955(8)   | Se1-C11     | 1.974(6)   | Se1-C11     | 1.969(5)   | Se1-C11     | 1.962(3)   | Se1-C14     | 1.986(6)   |
| Se2-Cu1     | 2.4364(16) | Se2-Cu1     | 2.4156(9)  | Se2-Cu1     | 2.4306(18) | Se2-Cu1     | 2.4095(6)  | Se1-Pd1     | 2.4198(9)  |
| Se2-C9      | 1.894(8)   | Se2-C6      | 1.908(5)   | Se2-C6      | 1.908(6)   | Se2-C6      | 1.907(3)   | Se2-C6      | 1.871(7)   |
| Se2-C14     | 1.958(9)   | Se2-C14     | 1.971(5)   | Se2-C14     | 1.983(5)   | Se2-C14     | 1.974(4)   | Se2-C11     | 1.983(6)   |
| Cu1-N1      | 2.237(6)   | Cu1-N1      | 2.232(4)   | Cu1-N1      | 2.185(4)   | Cu1-N1      | 2.184(3)   | Pd1-N1      | 2.087(4)   |
| N1-C15      | 1.503(10)  | N1-C15      | 1.497(6)   | N1-C15      | 1.488(7)   | N1-C15      | 1.496(4)   | N1-C15      | 1.543(8)   |
| N1-C12      | 1.488(11)  | N1-C12      | 1.473(6)   | N1-C12      | 1.470(6)   | N1-C12      | 1.483(4)   | N1-C12      | 1.498(8)   |
| N1-C13      | 1.476(10)  | N1-C13      | 1.479(6)   | N1-C13      | 1.485(7)   | N1-C13      | 1.488(4)   | N1-C13      | 1.513(7)   |
| Cu1-Se1-C1  | 106.7(2)   | Cu1-Se1-C1  | 112.14(17) | Cu1-Se1-C1  | 104.96(16) | Cu1-Se1-C1  | 107.55(11) | Pd1-Se1-C1  | 103.18(18) |
| Cu1-Se1-C11 | 91.5(2)    | Cu1-Se1-C11 | 89.89(16)  | Cu1-Se1-C11 | 90.15(16)  | Cu1-Se1-C11 | 89.67(10)  | Pd1-Se1-C14 | 94.06(18)  |
| C1-Se1-C11  | 97.4(4)    | C1-Se1-C11  | 97.0(2)    | C1-Se1-C11  | 95.8(2)    | C1-Se1-C11  | 98.95(15)  | C1-Se1-C14  | 96.7(3)    |
| Cu1-Se2-C9  | 110.6(2)   | Cu1-Se2-C6  | 110.14(17) | Cu1-Se2-C6  | 109.75(18) | Cu1-Se2-C6  | 106.94(10) | Pd1-Se2-C6  | 108.65(19) |
| Cu1-Se2-C14 | 92.2(3)    | Cu1-Se2-C14 | 91.54(17)  | Cu1-Se2-C14 | 91.46(18)  | Cu1-Se2-C14 | 90.22(11)  | Pd1-Se2-C11 | 93.85(19)  |
| Br1-Cu1-Se1 | 120.54(5)  | I1-Cu1-Se1  | 110.10(3)  | N2-Cu1-Se1  | 119.63(15) | O5-Cu1-Se1  | 122.73(9)  | Cl1-Pd1-Se1 | 90.86(5)   |
| Br1-Cu1-Se2 | 111.37(5)  | I1-Cu1-Se2  | 125.51(3)  | N2-Cu1-Se2  | 105.99(16) | O5-Cu1-Se2  | 105.59(9)  | Cl1-Pd1-Se2 | 92.92(5)   |
| Br1-Cu1-N1  | 114.74(17) | I1-Cu1-N1   | 115.94(10) | N2-Cu1-N1   | 116.06(19) | O5-Cu1-N1   | 106.76(12) | Cl1-Pd1-N1  | 177.76(14) |
| Se1-Cu1-Se2 | 122.64(5)  | Se1-Cu1-Se2 | 117.32(3)  | Se1-Cu1-Se2 | 128.14(4)  | Se1-Cu1-Se2 | 127.52(2)  | Se1-Pd1-Se2 | 176.20(3)  |
| Se1-Cu1-N1  | 90.39(18)  | Se1-Cu1-N1  | 89.47(11)  | Se1-Cu1-N1  | 90.92(12)  | Se1-Cu1-N1  | 92.64(7)   | Se1-Pd1-N1  | 88.64(14)  |
| Se2-Cu1-N1  | 88.93(17)  | Se2-Cu1-N1  | 90.39(11)  | Se2-Cu1-N1  | 90.12(13)  | Se2-Cu1-N1  | 91.87(7)   | Se2-Pd1-N1  | 87.57(13)  |

|            |          |            |          |            |          |            |            |            |          |
|------------|----------|------------|----------|------------|----------|------------|------------|------------|----------|
| Cu1-N1-C12 | 107.1(5) | Cu1-N1-C12 | 106.8(3) | Cu1-N1-C12 | 108.5(3) | Cu1-N1-C12 | 107.7(2)   | Pd1-N1-C12 | 107.8(3) |
| Cu1-N1-C13 | 109.3(5) | Cu1-N1-C13 | 106.1(3) | Cu1-N1-C13 | 108.6(3) | Cu1-N1-C13 | 106.5(2)   | Pd1-N1-C13 | 109.9(3) |
| Cu1-N1-C15 | 107.5(4) | Cu1-N1-C15 | 110.6(3) | Cu1-N1-C15 | 106.5(3) | Cu1-N1-C15 | 108.66(19) | Pd1-N1-C15 | 108.5(3) |
| C12-N1-C13 | 109.8(6) | C12-N1-C13 | 110.9(4) | C12-N1-C13 | 109.6(4) | C12-N1-C13 | 110.5(3)   | C12-N1-C13 | 108.0(5) |
| C12-N1-C15 | 110.9(7) | C12-N1-C15 | 111.9(4) | C12-N1-C15 | 110.8(4) | C12-N1-C15 | 110.9(3)   | C12-N1-C15 | 112.9(5) |
| C13-N1-C15 | 112.1(6) | C13-N1-C15 | 110.3(4) | C13-N1-C15 | 112.7(4) | C13-N1-C15 | 112.5(3)   | C13-N1-C15 | 109.8(5) |

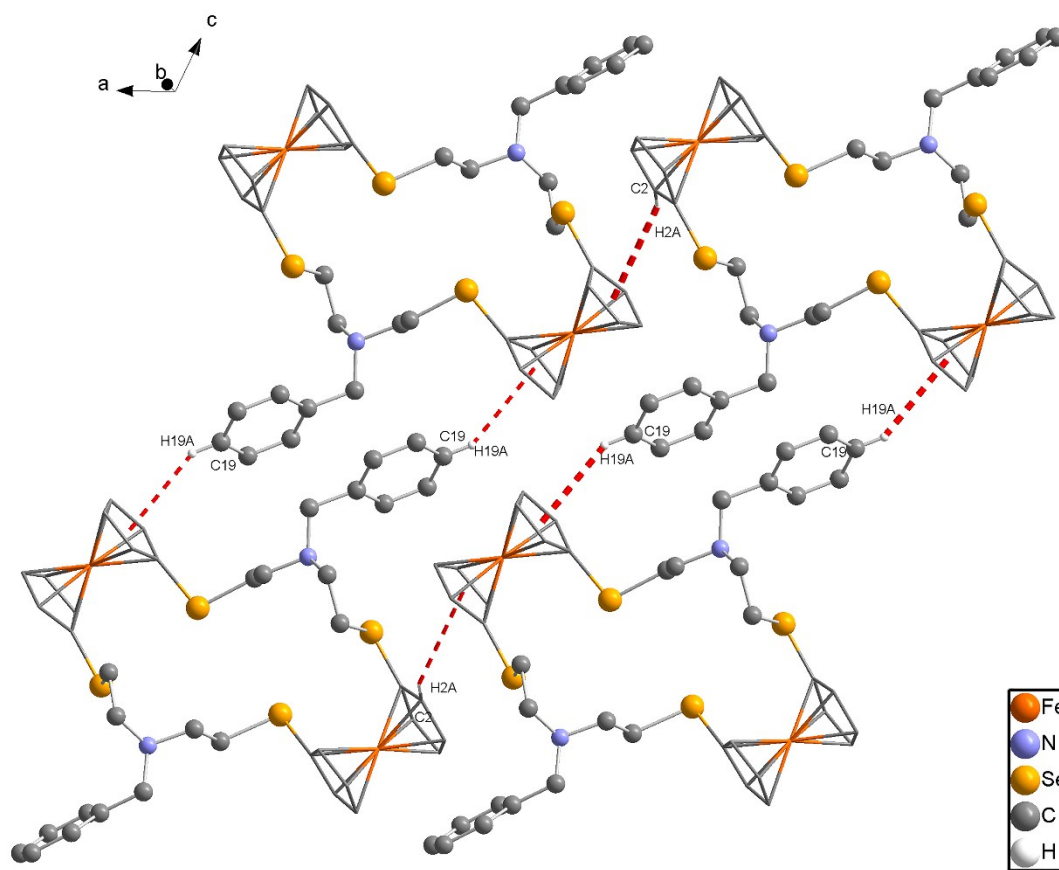

**Figure S1** The C-H... $\pi$  interactions involving intermolecular C2-H2A...Cg (C1-C5) of L1.

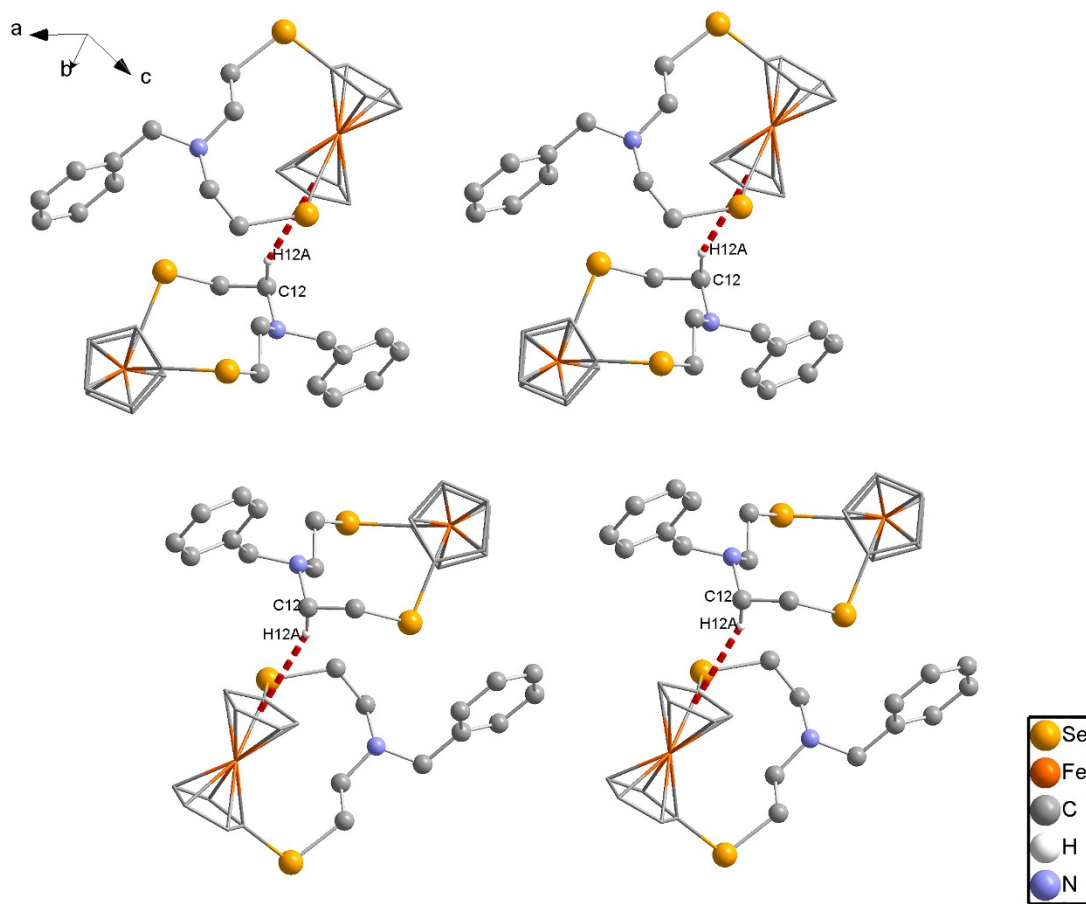

**Figure S2** The C-H... $\pi$  interactions involving intermolecular C12-H12A...Cg of L2.

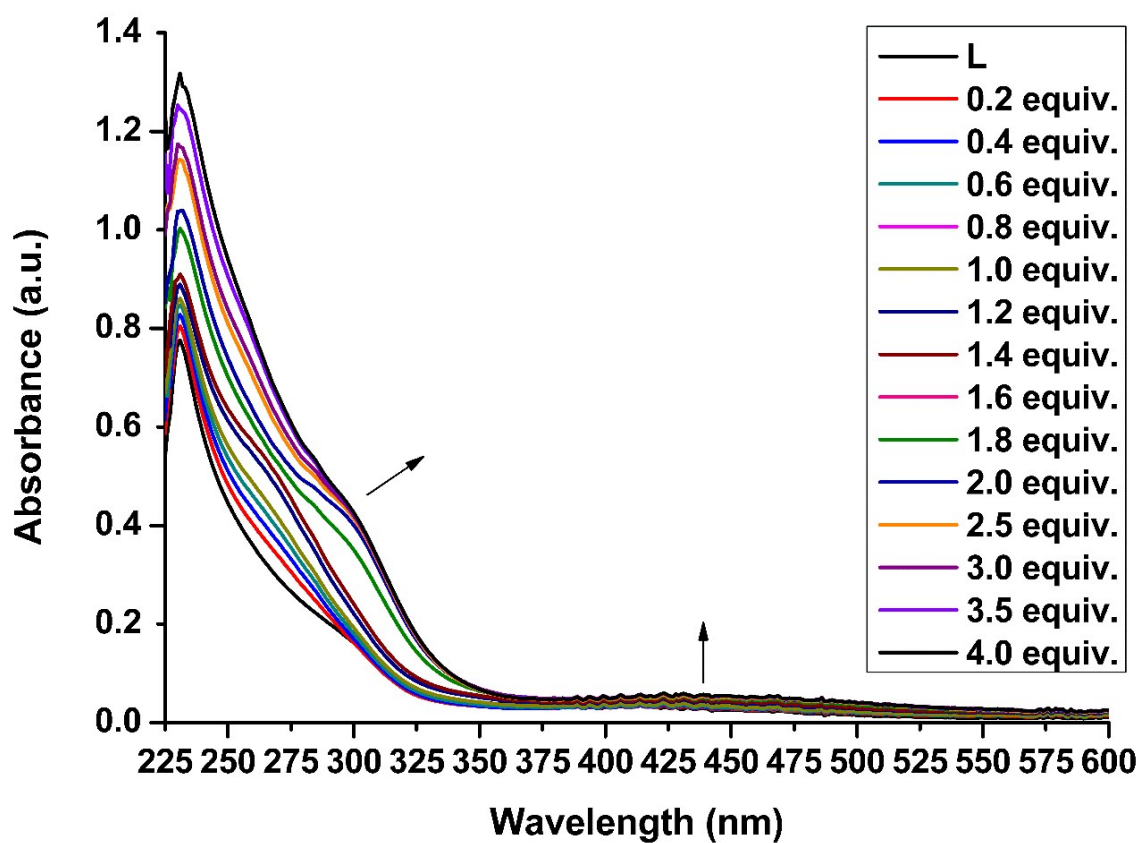

**Figure S3** Changes in the absorption spectra of receptor **L1** ( $2 \times 10^{-5}$  M) with increasing concentration of  $\text{Hg}^{2+}$  (0 to 4.0 equiv.) in a  $\text{CH}_3\text{CN}$  solution.



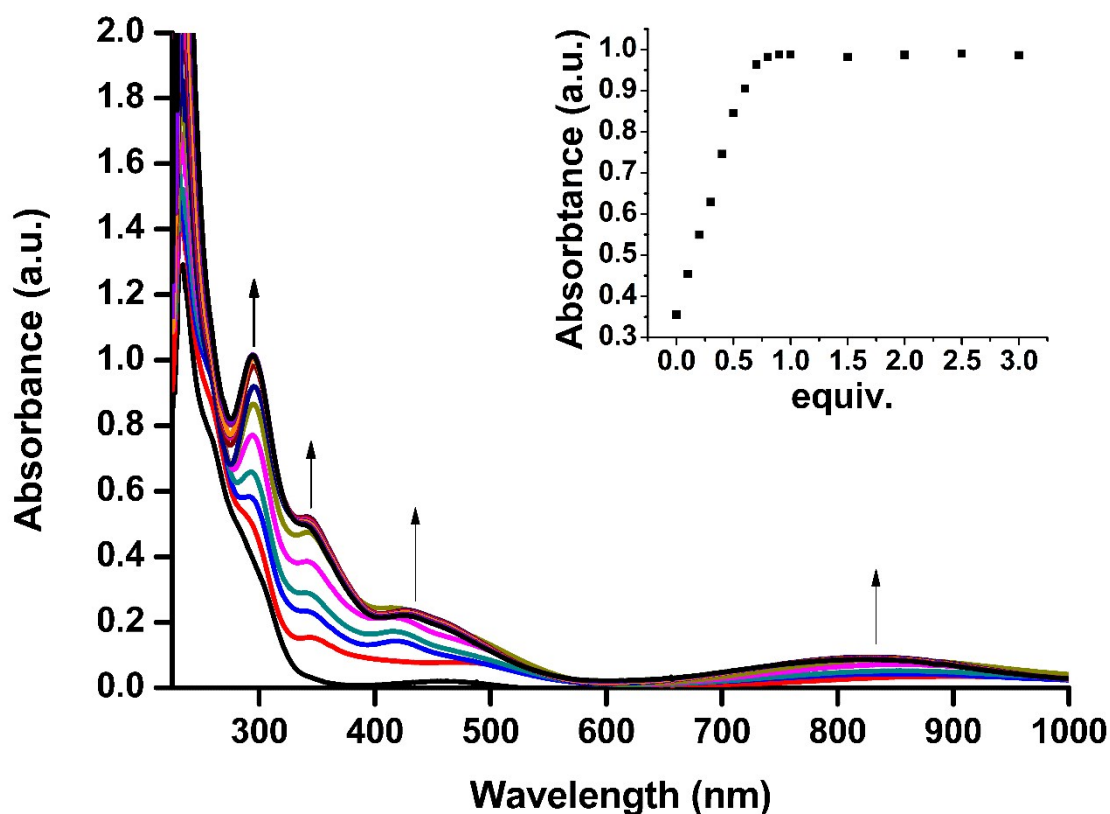

**Figure S4** Changes in the absorption spectra of receptor **L2** ( $2 \times 10^{-5}$  M) with increasing concentration of  $\text{Cu}^{2+}$  (0 to 3.0 equiv.) in a  $\text{CH}_3\text{CN}$  solution (inset:  $\text{Cu}^{2+}$  titration profile at 295 nm).

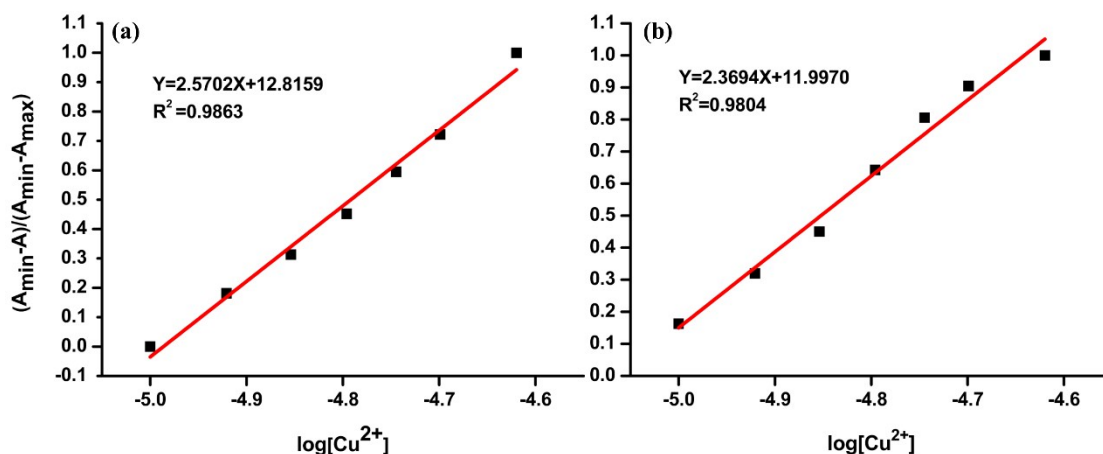

**Figure S5** (a) Absorbance of **L1** at different concentrations of  $\text{Cu}^{2+}$  added, normalized between the minimum absorbance and the maximum absorbance intensity. The detection limit was determined to be  $1.03 \times 10^{-5}$  M. (b) Absorbance of **L2** at different concentrations of  $\text{Cu}^{2+}$  added, normalized between the minimum absorbance and the maximum absorbance intensity. The detection limit was determined to be  $8.64 \times 10^{-6}$  M.

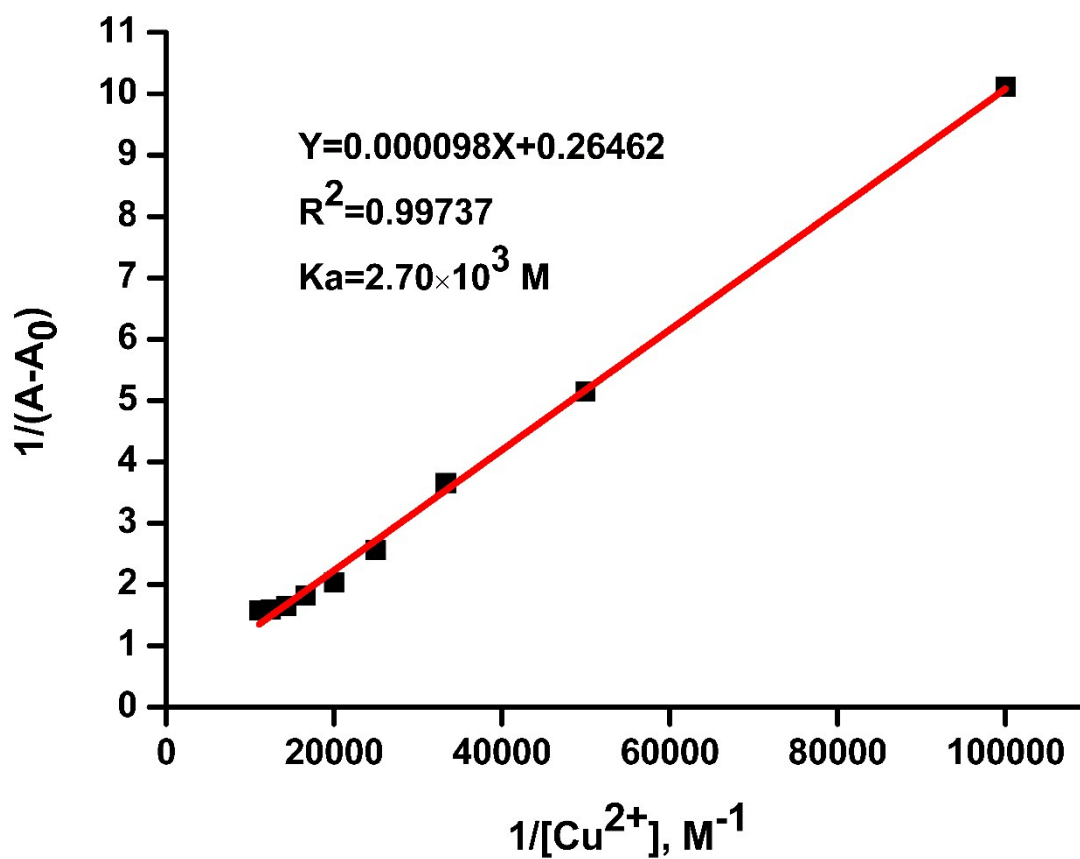

**Figure S6** The association constant for L2.

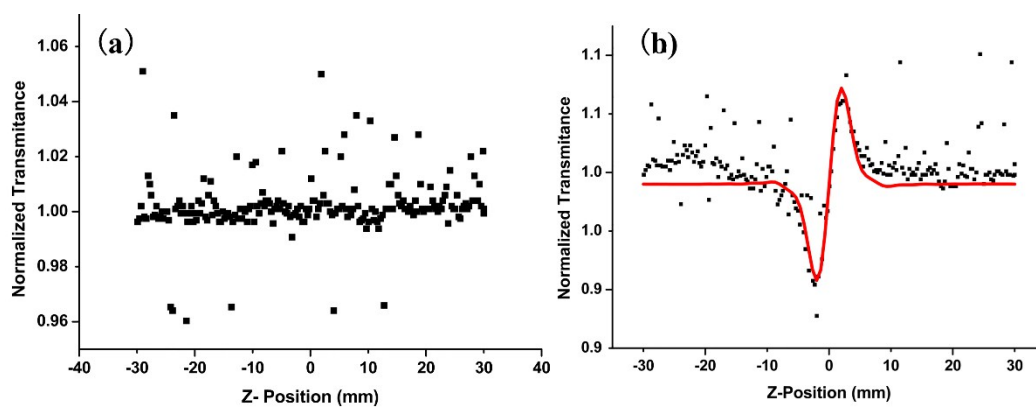

**Figure S7** The open aperture and closed aperture Z-scan results at 532 nm for L1 in CH<sub>3</sub>CN

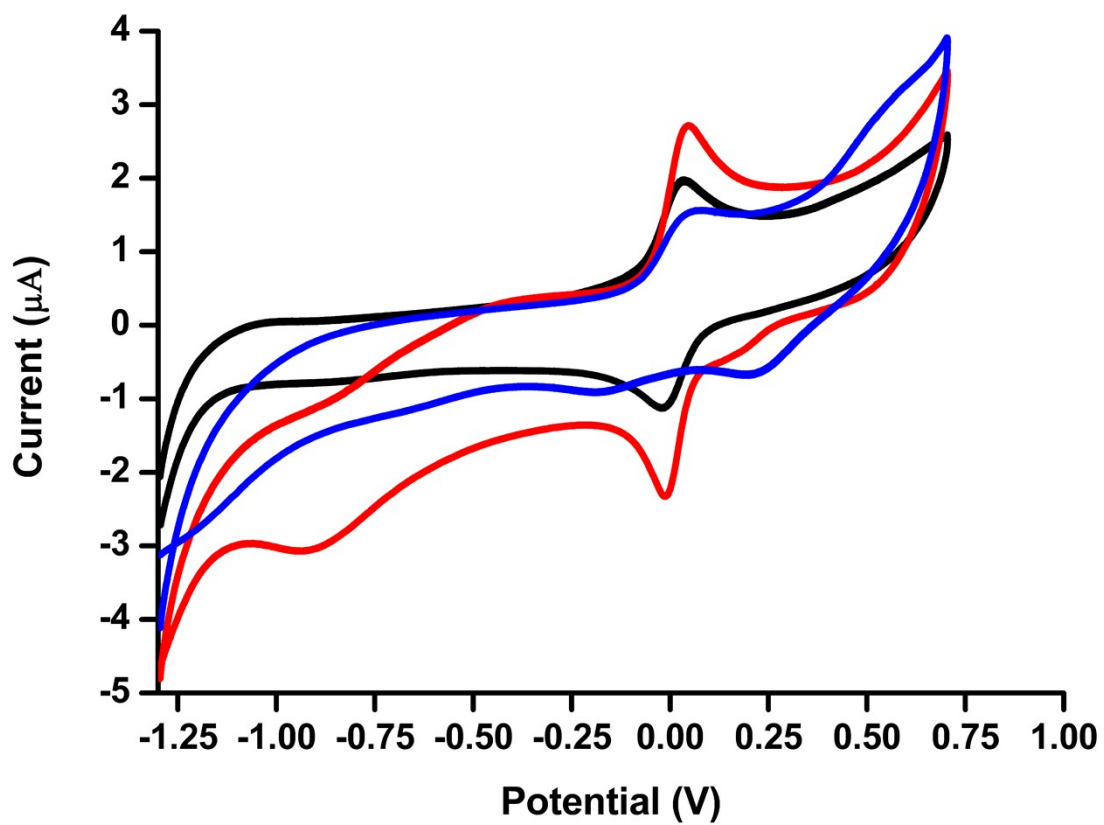

**Figure S8** Cyclic voltammogram of L1 (black line) in acetonitrile upon addition of  $\text{Cu}^{2+}$  (red line) and  $\text{Hg}^{2+}$  (blue line).

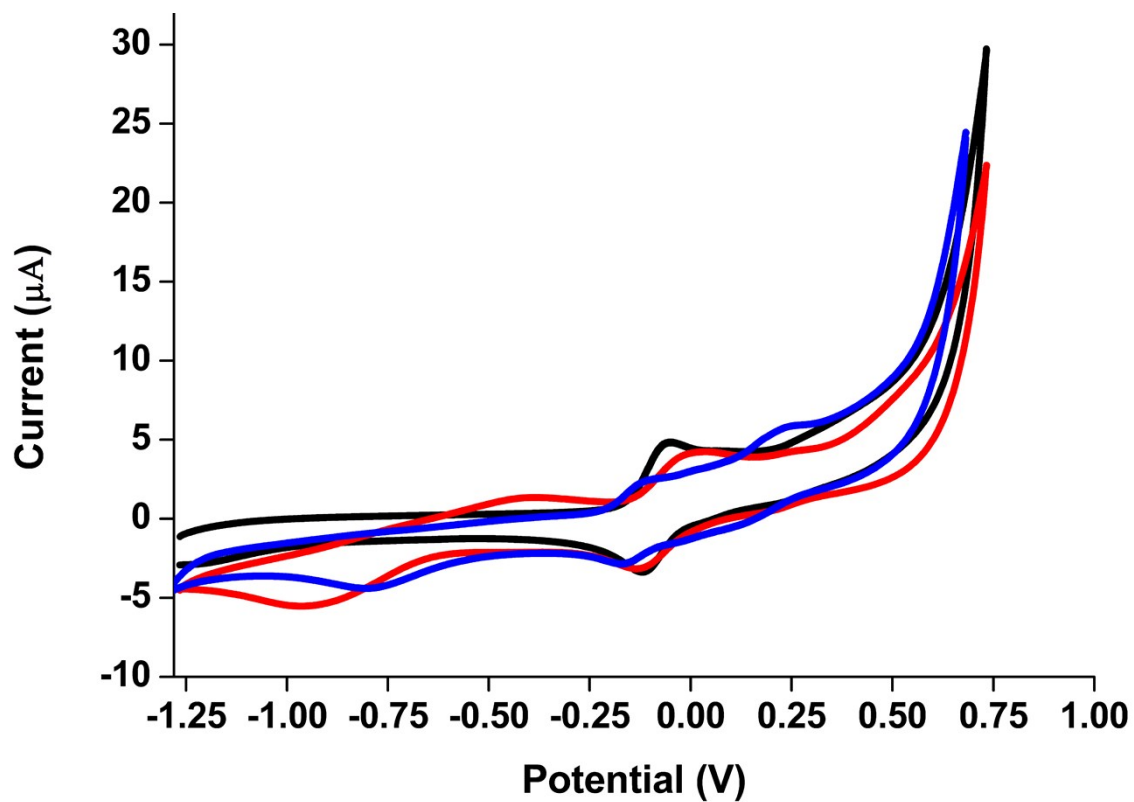

**Figure S9** Cyclic voltammogram of L2 (black line) in acetonitrile upon addition of  $\text{Cu}^{2+}$  (red line) and  $\text{Hg}^{2+}$  (blue line).

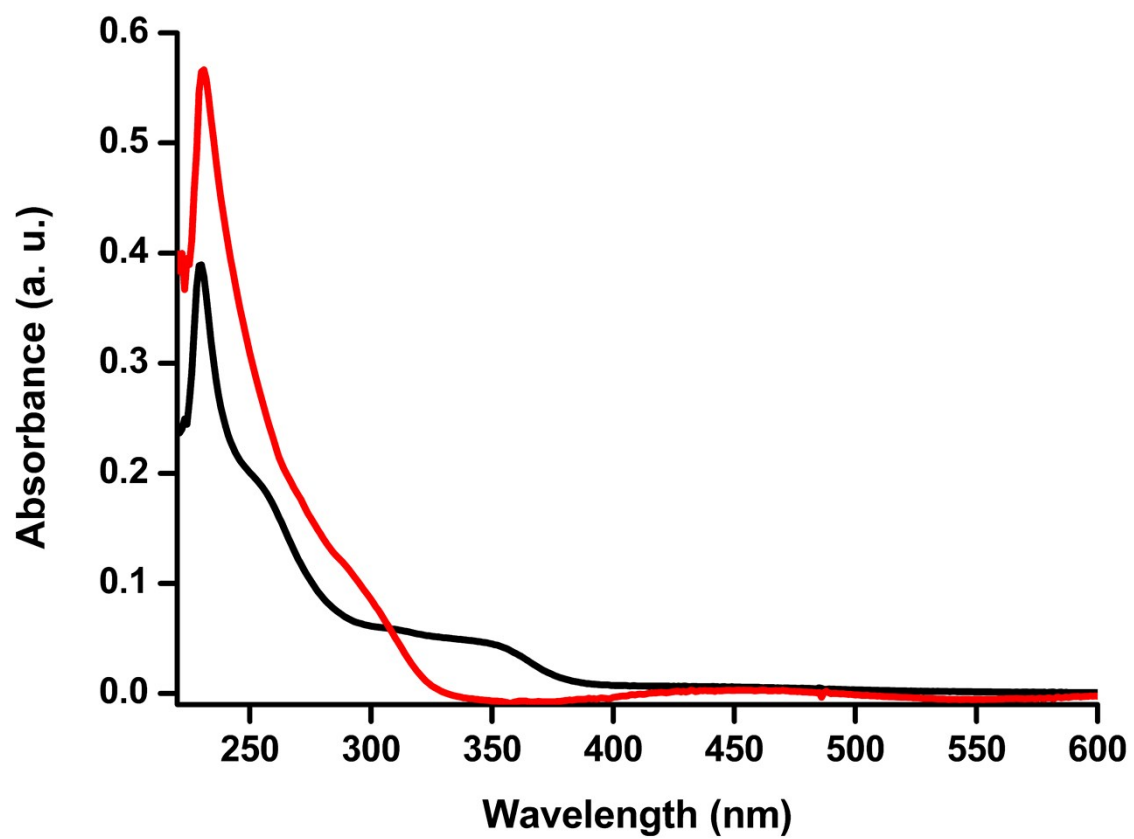

**Figure S10** UV-vis spectra of **L1** (red line) and 1,5,9,13-tetraselena[16]-naphtho[1,8-*c,d*]-ferrocenophane (black line)

(a) Frontier Orbitals of **3**

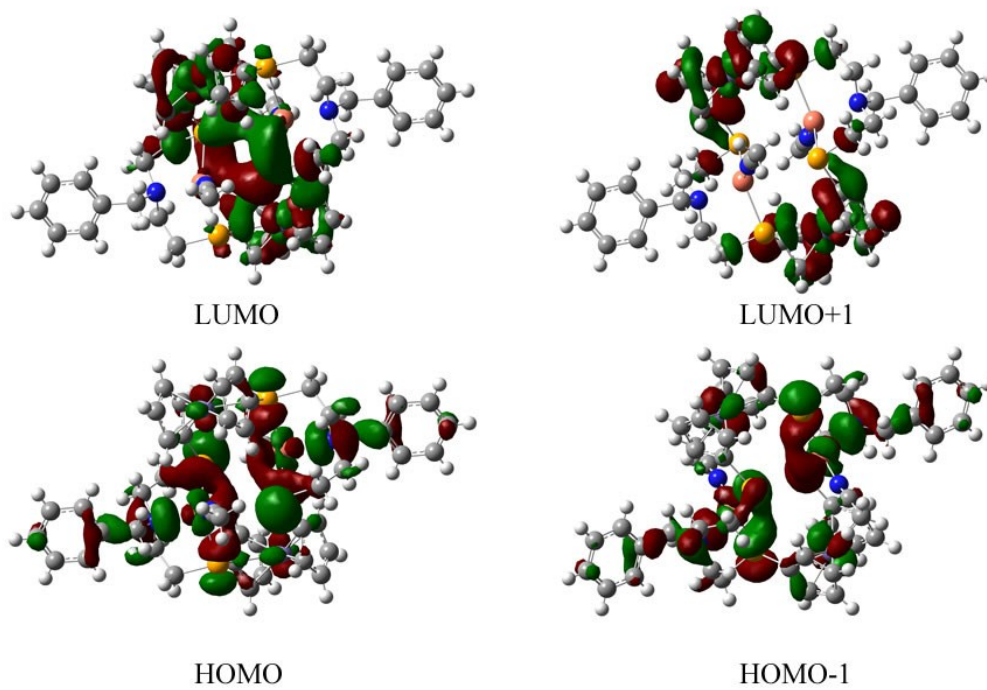

(a) Frontier Orbitals of **L1**

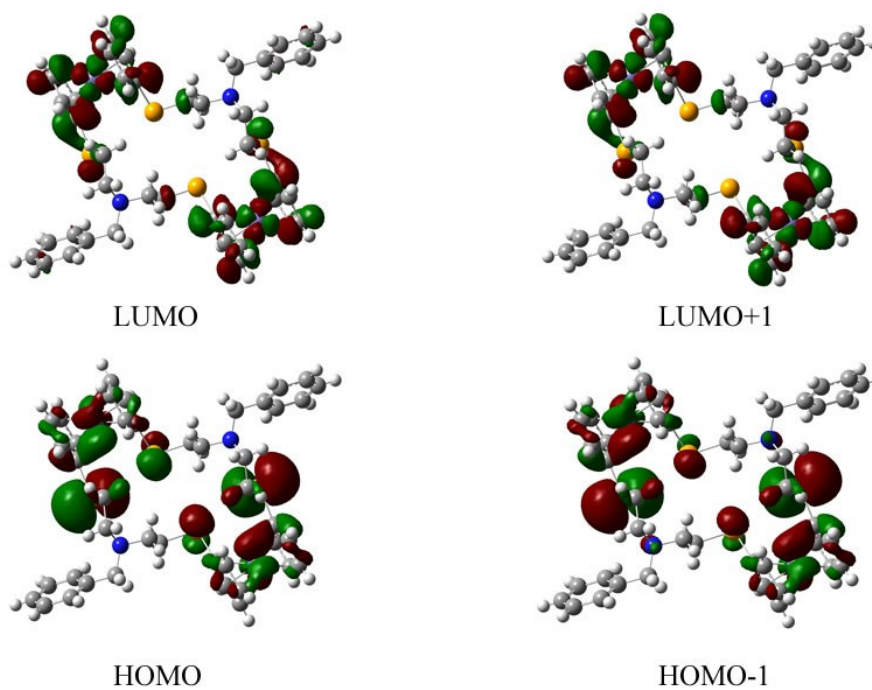

**Figure S11** The frontier orbitals of **3** and **L1**
